# Supplementary material for: Radical reactions of [60]fullerene with β-enamino carbonyl compounds mediated by manganese(iii) acetate
Source: Royal Society of Chemistry journal article supplement (doi:10.1039/b604626f), 2006-01-01
Supplement: b604626f.pdf [file b604626f.pdf]

## Supporting Information

### Radical reactions of [60]fullerene with beta enamino carbonyl compounds mediated by manganese(III) acetate

Guan-Wu Wang,<sup>\*a,b</sup> Hai-Tao Yang,<sup>a</sup> Chun-Bao Miao,<sup>a</sup> Yu Xu<sup>a</sup> and Fei Liu<sup>a</sup>

<sup>a</sup>Hefei National Laboratory for Physical Sciences at Microscale and Department of Chemistry, University of Science and Technology of China, Hefei, Anhui 230026, P. R. China. E-mail:

gwang@ustc.edu.cn; Fax: +86-551-360-7864

<sup>b</sup> State Key Laboratory of Applied Organic Chemistry, Lanzhou University, Lanzhou, Gansu 730000, P. R. China

|                                                 |      |
|-------------------------------------------------|------|
| <sup>1</sup> H NMR spectrum of <b>2a</b> .....  | S2   |
| <sup>13</sup> C NMR spectrum of <b>2a</b> ..... | S3-7 |
| <sup>1</sup> H NMR spectrum of <b>2b</b> .....  | S8   |
| <sup>1</sup> H NMR spectrum of <b>2c</b> .....  | S9   |
| <sup>1</sup> H NMR spectrum of <b>2d</b> .....  | S10  |
| <sup>1</sup> H NMR spectrum of <b>2e</b> .....  | S11  |
| <sup>1</sup> H NMR spectrum of <b>2f</b> .....  | S12  |
| <sup>1</sup> H NMR spectrum of <b>2g</b> .....  | S13  |
| <sup>1</sup> H NMR spectrum of <b>2h</b> .....  | S14  |

# <sup>1</sup>H NMR spectrum of 2a

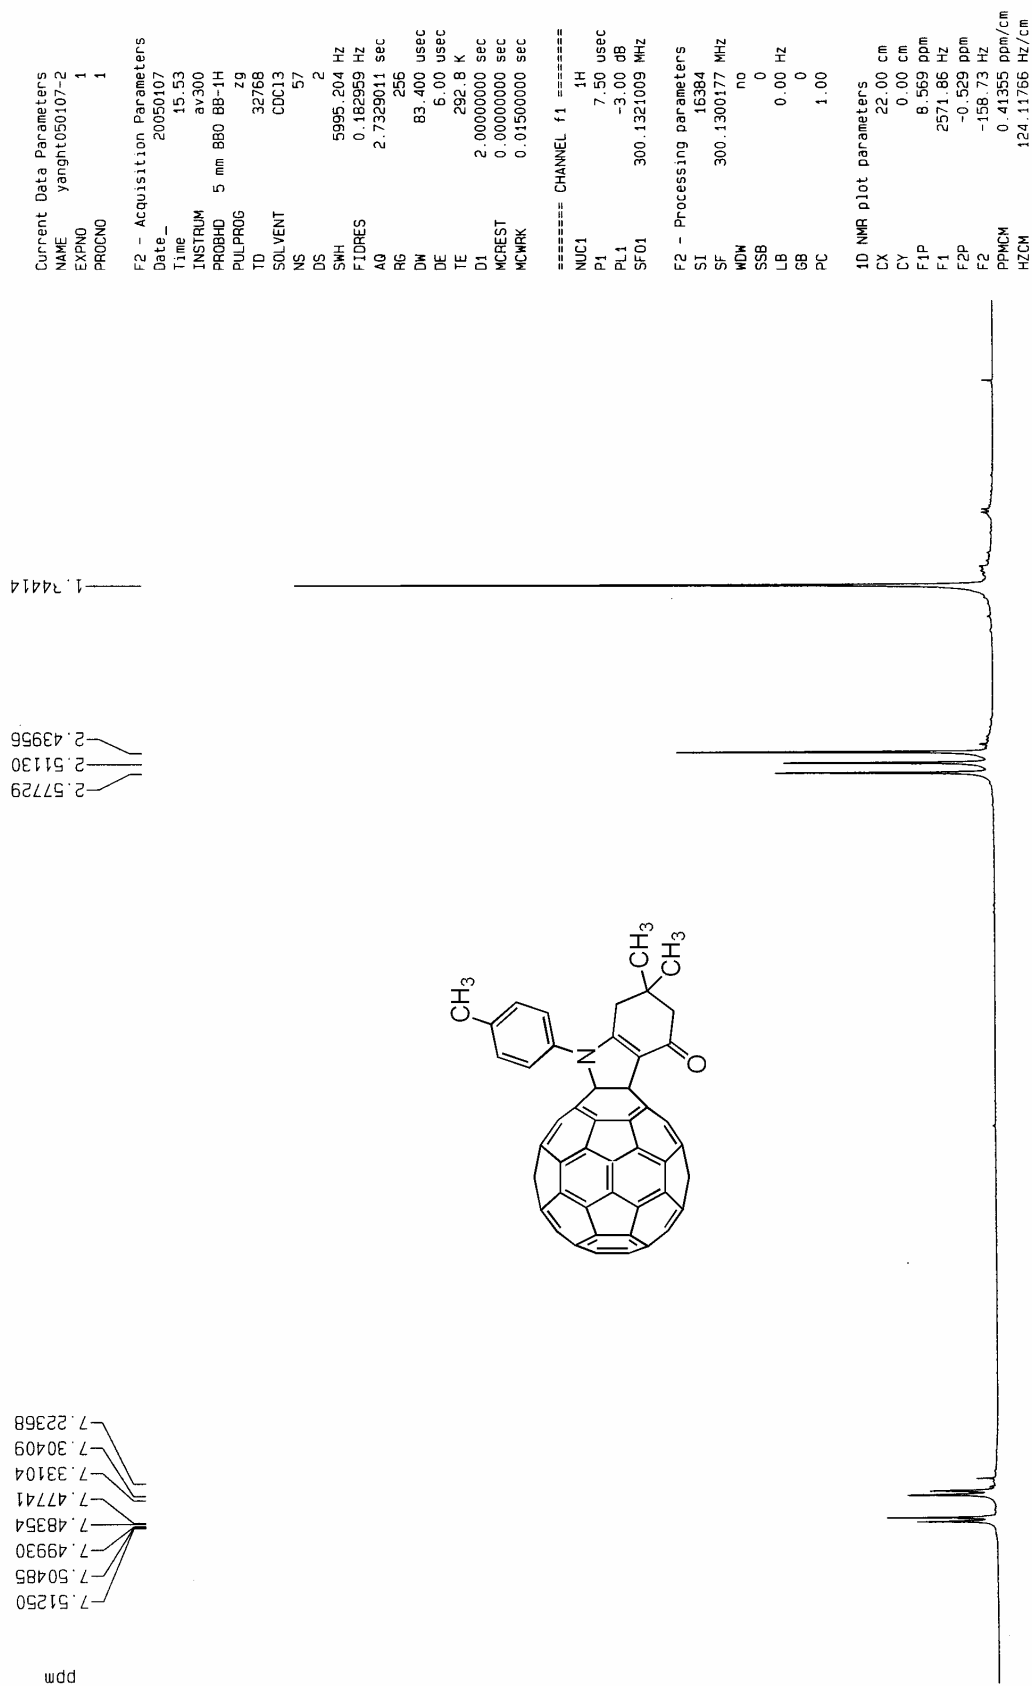

# <sup>13</sup>C NMR spectrum of 2a

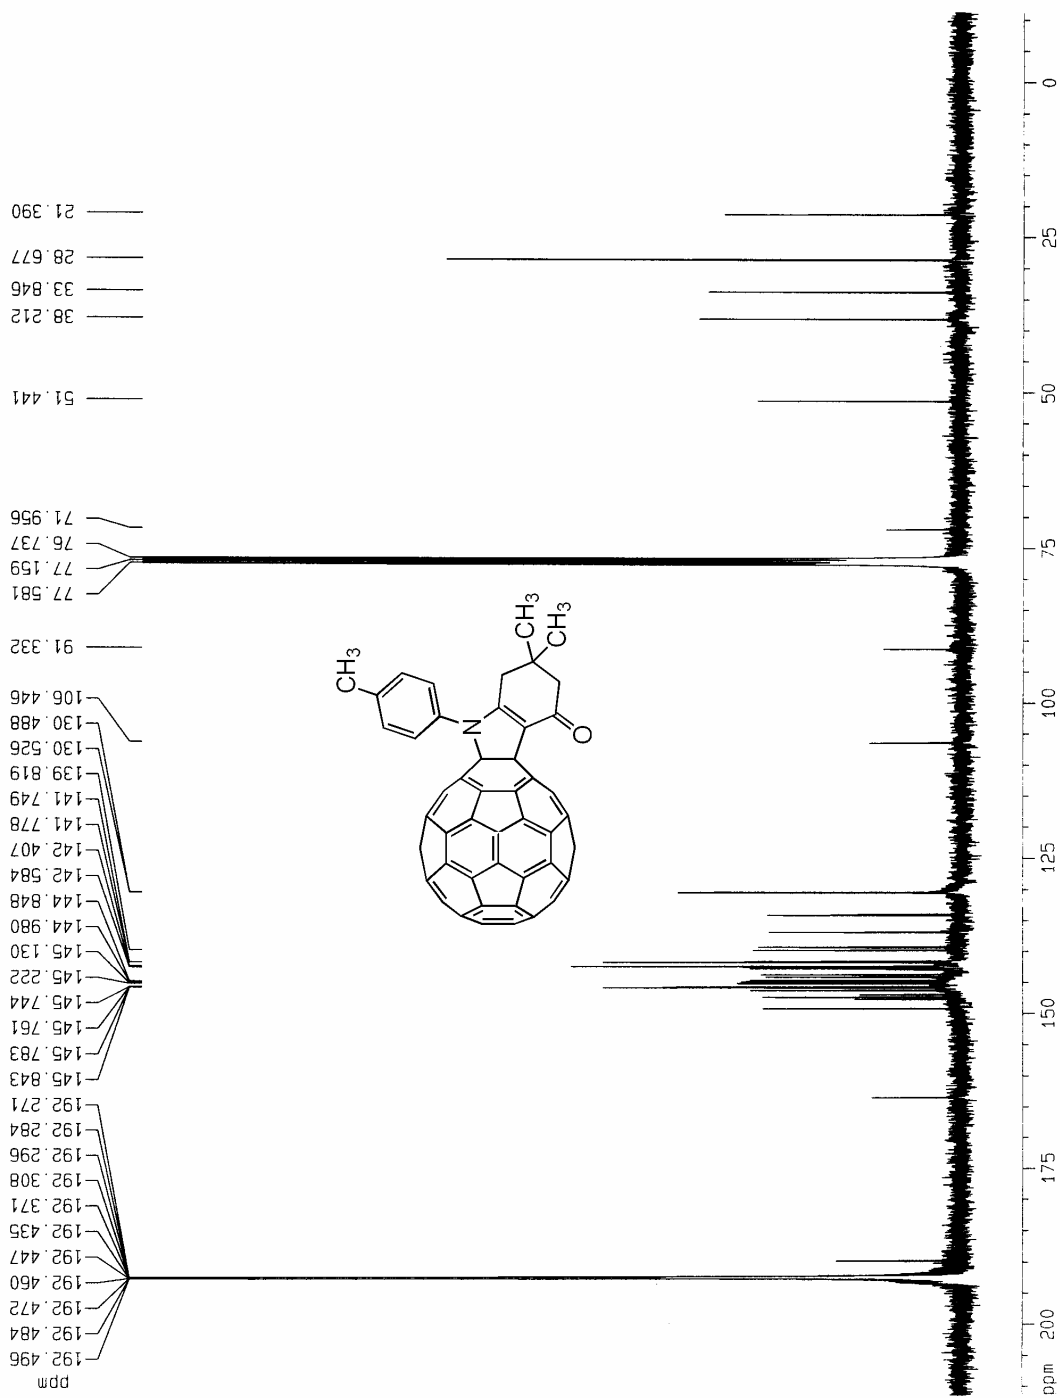

Current Data Parameters  
 NAME yanght040107-2c  
 EXPNO 2  
 PROCNO 1

F2 - Acquisition Parameters  
 Date\_ 20050110  
 Time 17.27  
 INSTRUM av300  
 PROBHD 5 mm BBO BB-1H  
 PULPROG zgdc  
 TD 65536  
 SOLVENT CDCl3  
 NS 17065  
 DS 2  
 SWH 30120.462 Hz  
 FIDRES 0.459602 Hz  
 AQ 1.0879476 sec  
 RG 9195.2  
 DM 16.600 usec  
 DE 6.00 usec  
 TE 291.9 K  
 D1 2.00000000 sec  
 d11 0.03000000 sec  
 MCREST 0.00000000 sec  
 NCMRK 0.01500000 sec

==== CHANNEL f1 =====  
 NUC1 13C  
 P1 2.40 usec  
 PL1 -6.00 dB  
 SF01 75.4752958 MHz

==== CHANNEL f2 =====  
 CPDPRG2 waltz16  
 NUC2 1H  
 PCPD2 80.00 usec  
 PL2 120.00 dB  
 PL12 16.00 dB  
 SF02 300.1315007 MHz

F2 - Processing parameters  
 SI 131072  
 SF 75.4677662 MHz  
 WDW EM  
 SSB 0  
 LB 1.00 Hz  
 GB 0  
 PC 1.40

1D NMR plot parameters  
 CX 22.00 cm  
 CY 0.00 cm  
 F1P 211.458 ppm  
 F1 15958.27 Hz  
 F2P -11.243 ppm  
 F2 -648.46 Hz  
 PPMCM 10.12276 ppm/cm  
 HZCM 763.94196 Hz/cm

# <sup>13</sup>C NMR spectrum of 2a

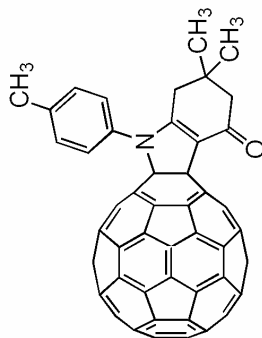

```

Current Data Parameters
NAME yanght040107-2c
EXPNO 2
PROCNO 1

F2 - Acquisition Parameters
Date_ 20050110
Time 17.27
INSTRUM av300
PROBHD 5 mm BBO BB-1H
PULPROG zgpg
TD 65536
SOLVENT CDC13
NS 17065
DS 2
SWH 30120.482 Hz
FIDRES 0.459602 Hz
AQ 1.0879476 sec
RG 9195.2
DM 16.600 usec
DE 6.00 usec
TE 291.9 K
D1 2.00000000 sec
d11 0.03000000 sec
MCREST 0.00000000 sec
MCWRK 0.01500000 sec

===== CHANNEL f1 =====
NUC1 13C
P1 2.40 usec
PL1 -6.00 dB
SF01 75.4752956 MHz

===== CHANNEL f2 =====
CPDPRG2 waltz16
NUC2 1H
PCPD2 80.00 usec
PL2 120.00 dB
PL12 16.00 dB
SF02 300.1315007 MHz

F2 - Processing parameters
SI 131072
SF 75.4677662 MHz
WDW EM
SSB 0
LB 1.00 Hz
GB 0
PC 1.40

1D NMR plot parameters
CX 22.00 cm
CY 0.00 cm
F1P 190.789 ppm
F1 14398.39 Hz
F2P 161.022 ppm
F2 12151.96 Hz
DPMCH 1.35304 ppm/cm
HZCM 102.11059 Hz/cm
  
```

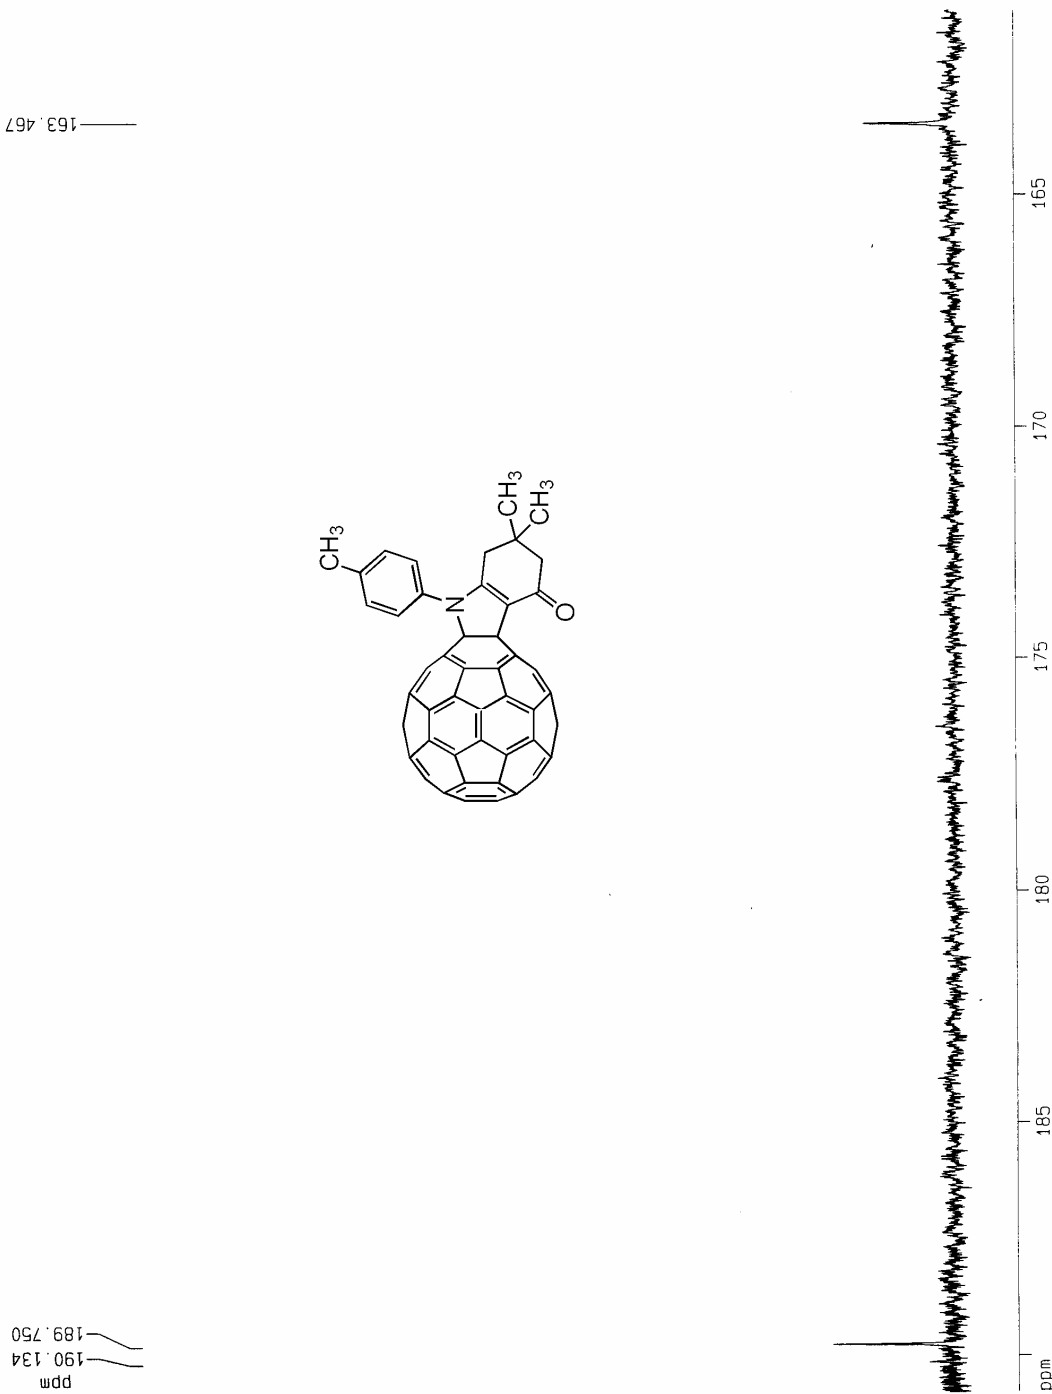

Current Data Parameters  
 NAME yanght040107-2c  
 EXPNO 2  
 PROCNO 1

F2 - Acquisition Parameters  
 Date\_ 20050110  
 Time 17.27  
 INSTRUM av300  
 PROBHD 5 mm BB-1H  
 PULPROG zgdc  
 TD 65536  
 SOLVENT CDCl3  
 NS 17065  
 DS 2  
 SWH 30120.482 Hz  
 FIDRES 0.459602 Hz  
 AQ 1.0879476 sec  
 RG 9195.2  
 DW 16.600 usec  
 DE 6.00 usec  
 TE 291.9 K  
 D1 2.00000000 sec  
 d11 0.03000000 sec  
 MCREST 0.00000000 sec  
 MCMRK 0.01500000 sec

==== CHANNEL f1 =====  
 NUC1 13C  
 P1 2.40 usec  
 PL1 -6.00 dB  
 SF01 75.4752958 MHz

==== CHANNEL f2 =====  
 CPDPRG2 waltz16  
 NUC2 1H  
 PCPD2 80.00 usec  
 PL2 120.00 dB  
 PL12 16.00 dB  
 SF02 300.1315007 MHz

F2 - Processing parameters  
 SI 131072  
 SF 75.4677662 MHz  
 MDW EM  
 SSB 0  
 LB 1.00 Hz  
 GB 0  
 PC 1.40

1D NMR plot parameters  
 CX 22.00 cm  
 CY 0.00 cm  
 F1P 149.387 ppm  
 F1 11273.91 Hz  
 F2P 145.667 ppm  
 F2 10993.15 Hz  
 PPMCM 0.16911 ppm/cm  
 -ZCM 12.76202 Hz/cm

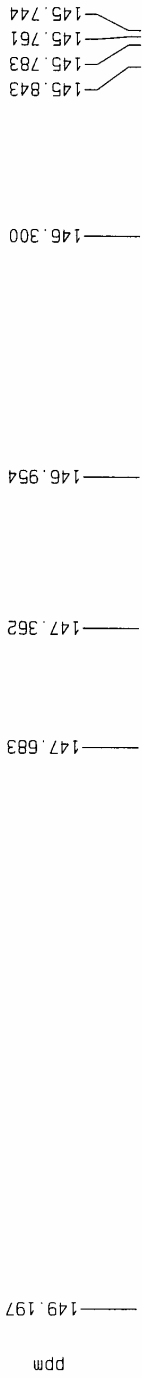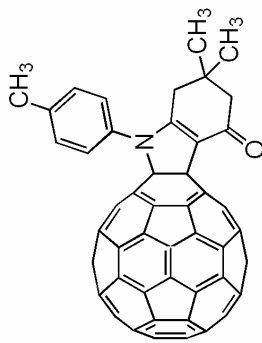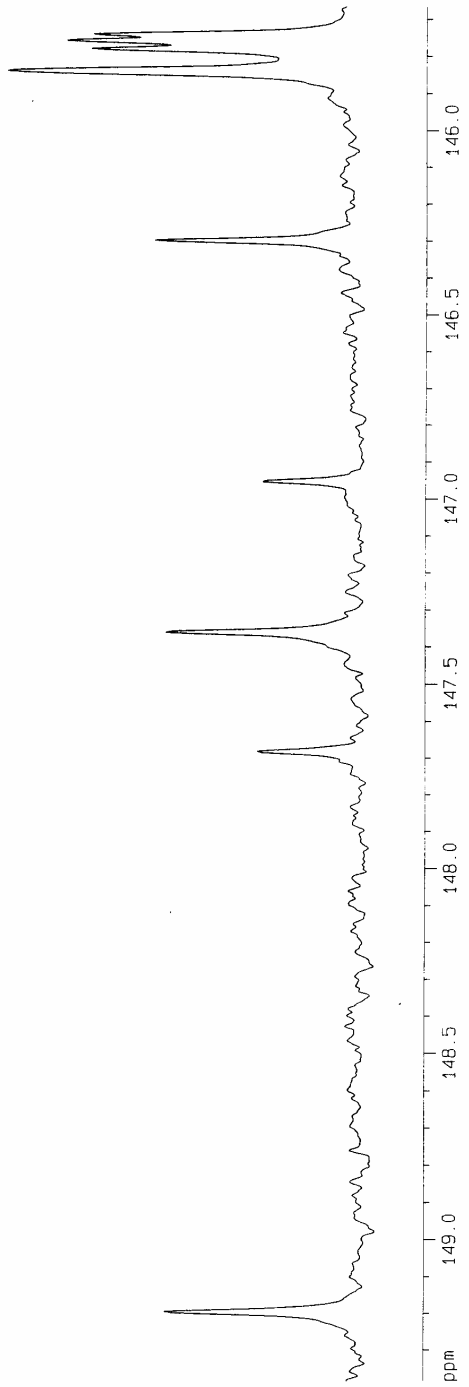

Current Data Parameters

NAME yanght040107-2c  
 EXPNO 2  
 PROCNO 1

F2 - Acquisition Parameters

Date\_ 20050110  
 Time 17.27  
 INSTRUM av300  
 PROBHD 5 mm BBO BB-1H  
 PULPROG zgpg  
 TD 65536  
 SOLVENT CDCl3  
 NS 17055  
 DS 2  
 SWH 30120.482 Hz  
 FIDRES 0.459602 Hz  
 AQ 1.0879476 sec  
 RG 9195.2  
 DW 16.600 usec  
 DE 6.00 usec  
 TE 291.9 K  
 D1 2.0000000 sec  
 d11 0.0300000 sec  
 MCREST 0.0000000 sec  
 MCWRR 0.0150000 sec

===== CHANNEL f1 =====  
 NU1C1 13C  
 P1 2.40 usec  
 PL1 -6.00 dB  
 SF01 75.4752958 MHz

===== CHANNEL f2 =====  
 CPDPRG2 waltz16  
 NU2C 1H  
 PCPD2 80.00 usec  
 PL2 120.00 dB  
 PL12 16.00 dB  
 SF02 300.1315007 MHz

F2 - Processing parameters  
 SI 131072  
 SF 75.4677662 MHz  
 WDW EM  
 SSB 0  
 LB 1.00 Hz  
 GB 0  
 PC 1.40

1D NMR plot parameters  
 CX 22.00 cm  
 CY 0.00 cm  
 F1P 145.492 ppm  
 F1 10979.93 Hz  
 F2P 141.334 ppm  
 F2 10666.19 Hz  
 PPMCM 0.1897 ppm/cm  
 HZCM 14.26128 Hz/cm

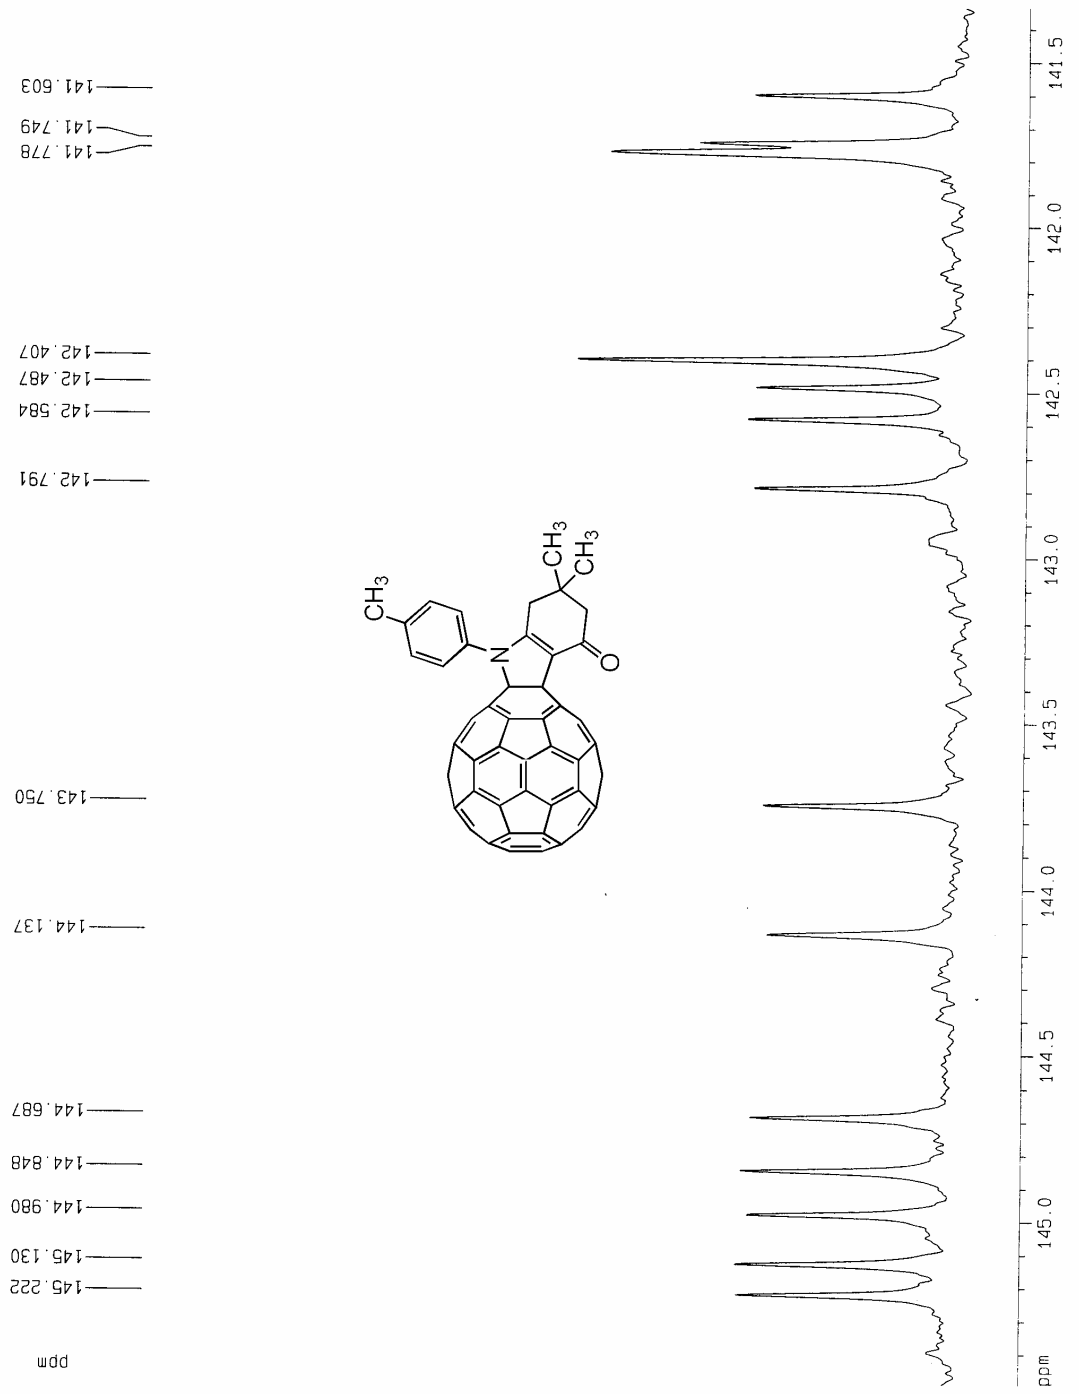

# <sup>13</sup>C NMR spectrum of 2a

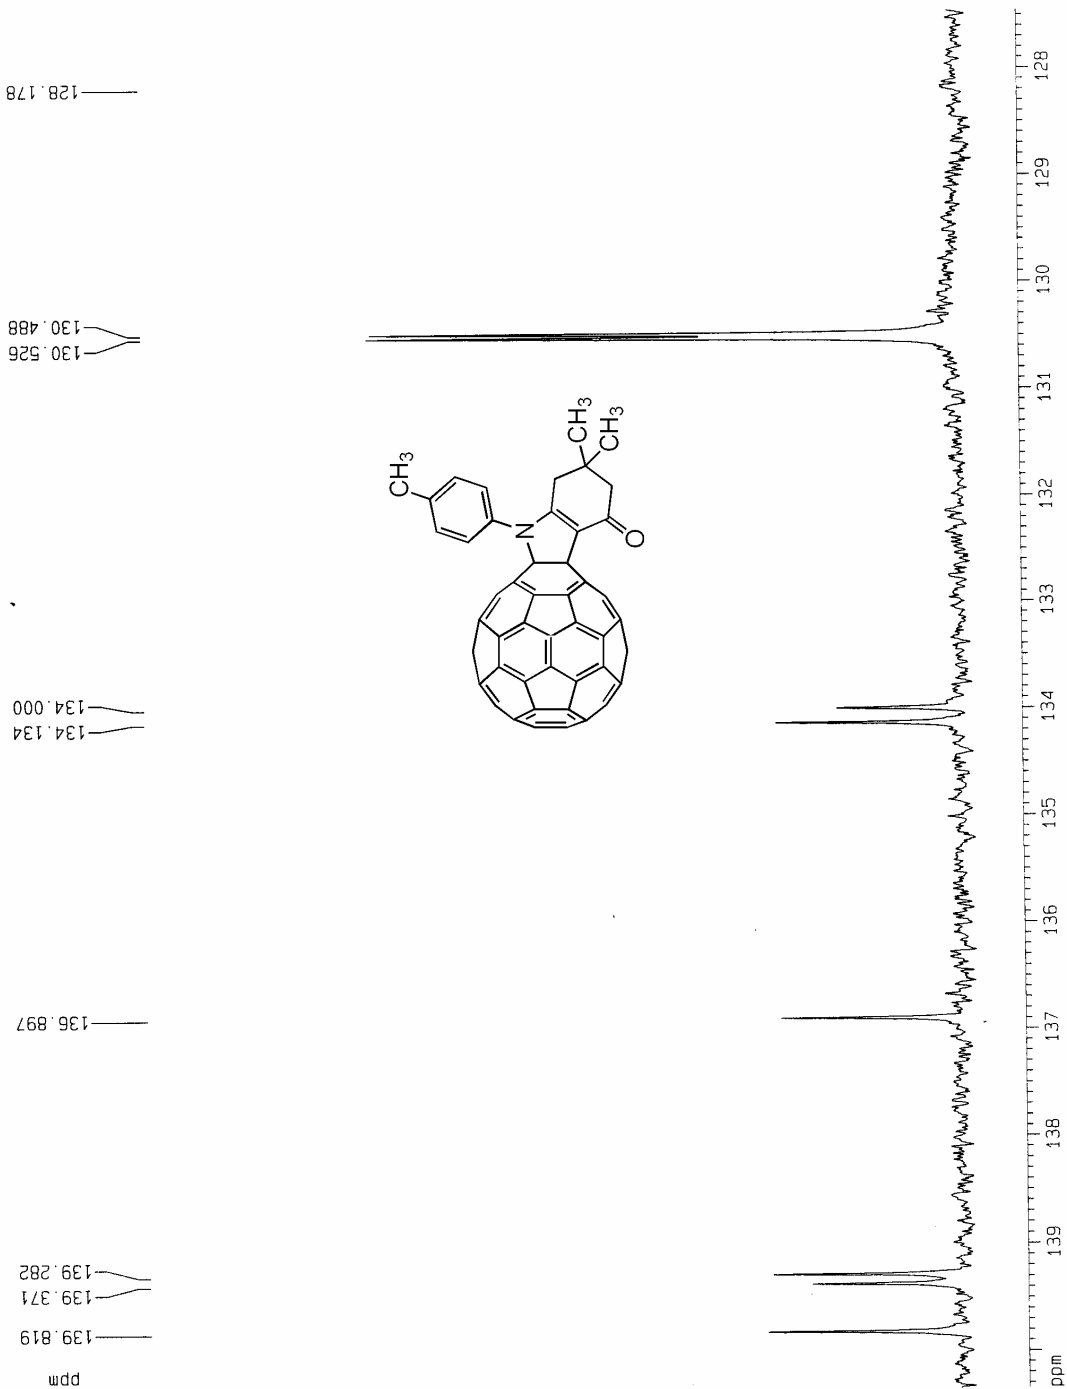

Current Data Parameters  
 NAME yang1040107-2c  
 EXPNO 2  
 PROCNO 1

F2 - Acquisition Parameters  
 Date\_ 20050110  
 Time 17.27  
 INSTRUM av300  
 PROBHD 5 mm BBO BB-1H  
 PULPROG zgdc  
 TD 65536  
 SOLVENT CDCl3  
 NS 17065  
 DS 2  
 SWH 30120.482 Hz  
 FIDRES 0.459602 Hz  
 AQ 1.0879475 sec  
 RG 9195.2  
 DM 16.600 usec  
 DE 6.00 usec  
 TE 291.9 K  
 D1 2.0000000 sec  
 d11 0.0300000 sec  
 MCREST 0.0000000 sec  
 MCWRK 0.0150000 sec

==== CHANNEL f1 =====  
 NUC1 13C  
 P1 2.40 usec  
 PL1 -6.00 dB  
 SF01 75.4752958 MHz

==== CHANNEL f2 =====  
 CPDPRG2 waltz16  
 NUC2 1H  
 PCPD2 80.00 usec  
 PL2 120.00 dB  
 PL12 16.00 dB  
 SF02 300.1315007 MHz

F2 - Processing parameters  
 SI 131072  
 SF 75.4677662 MHz  
 WDW EM  
 SSB 0  
 LB 1.00 Hz  
 GB 0  
 PC 1.40

1D NMR plot parameters  
 CX 22.00 cm  
 CY 0.00 cm  
 F1P 140.353 ppm  
 F1 10592.11 Hz  
 F2P 127.452 ppm  
 F2 9618.54 Hz  
 PPMCM 0.58639 ppm/cm  
 HZCM 44.25326 Hz/cm

# <sup>1</sup>H NMR spectrum of 2b

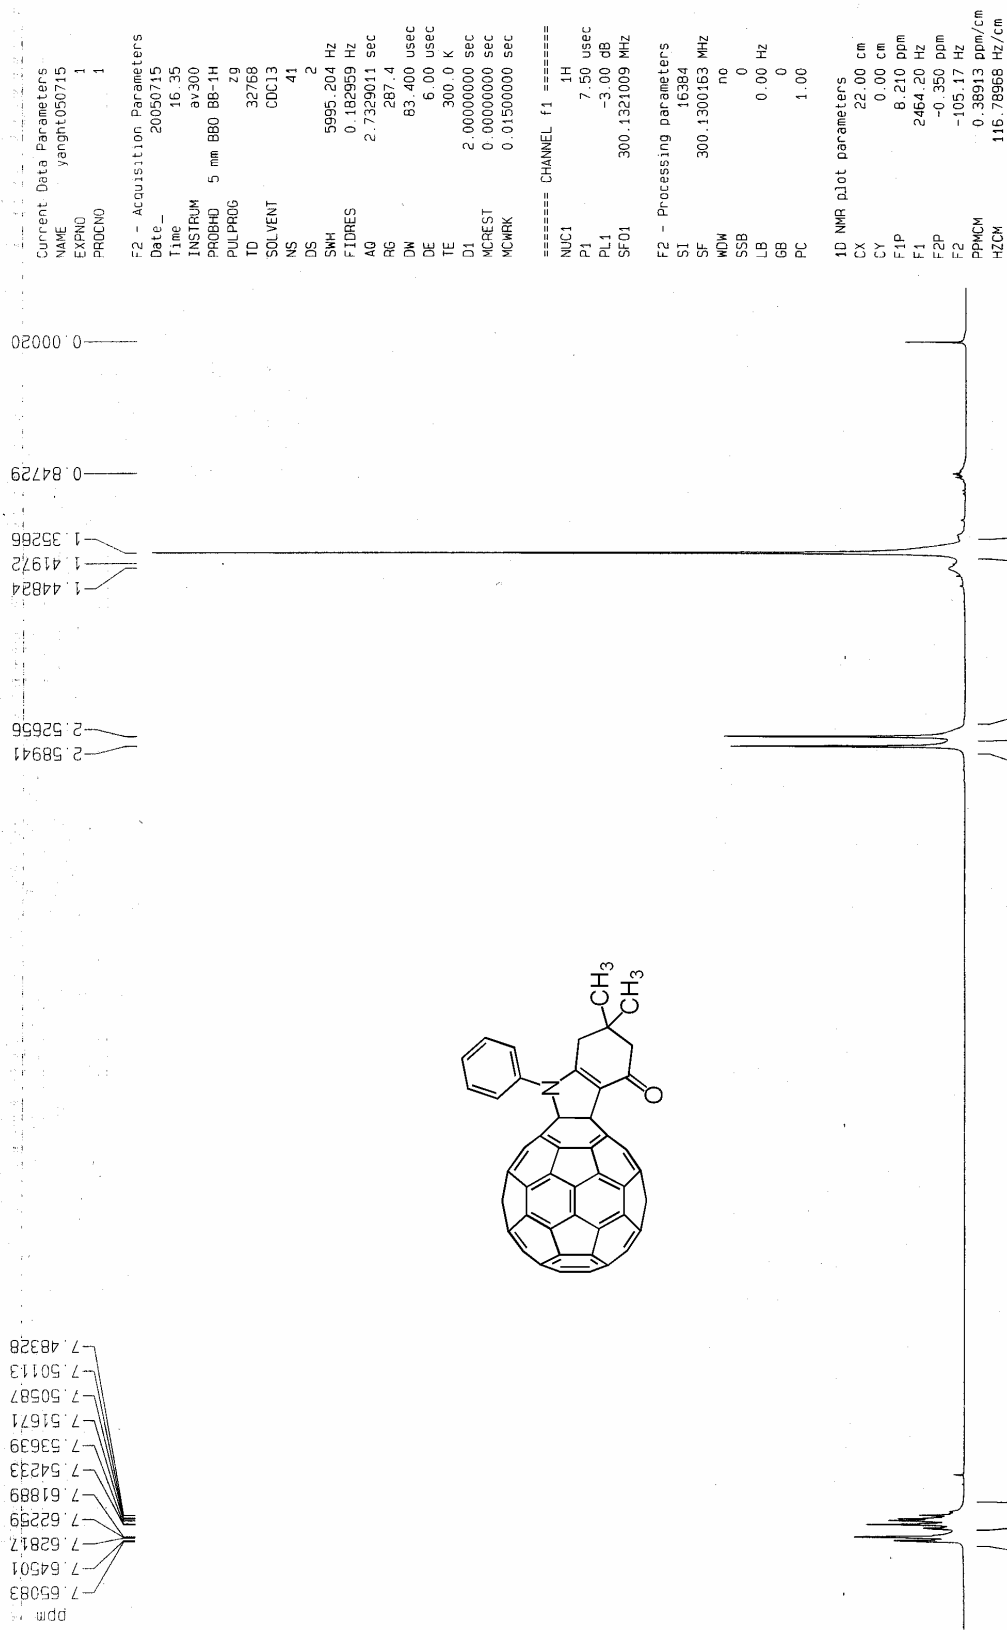



# <sup>1</sup>H NMR spectrum of 2c

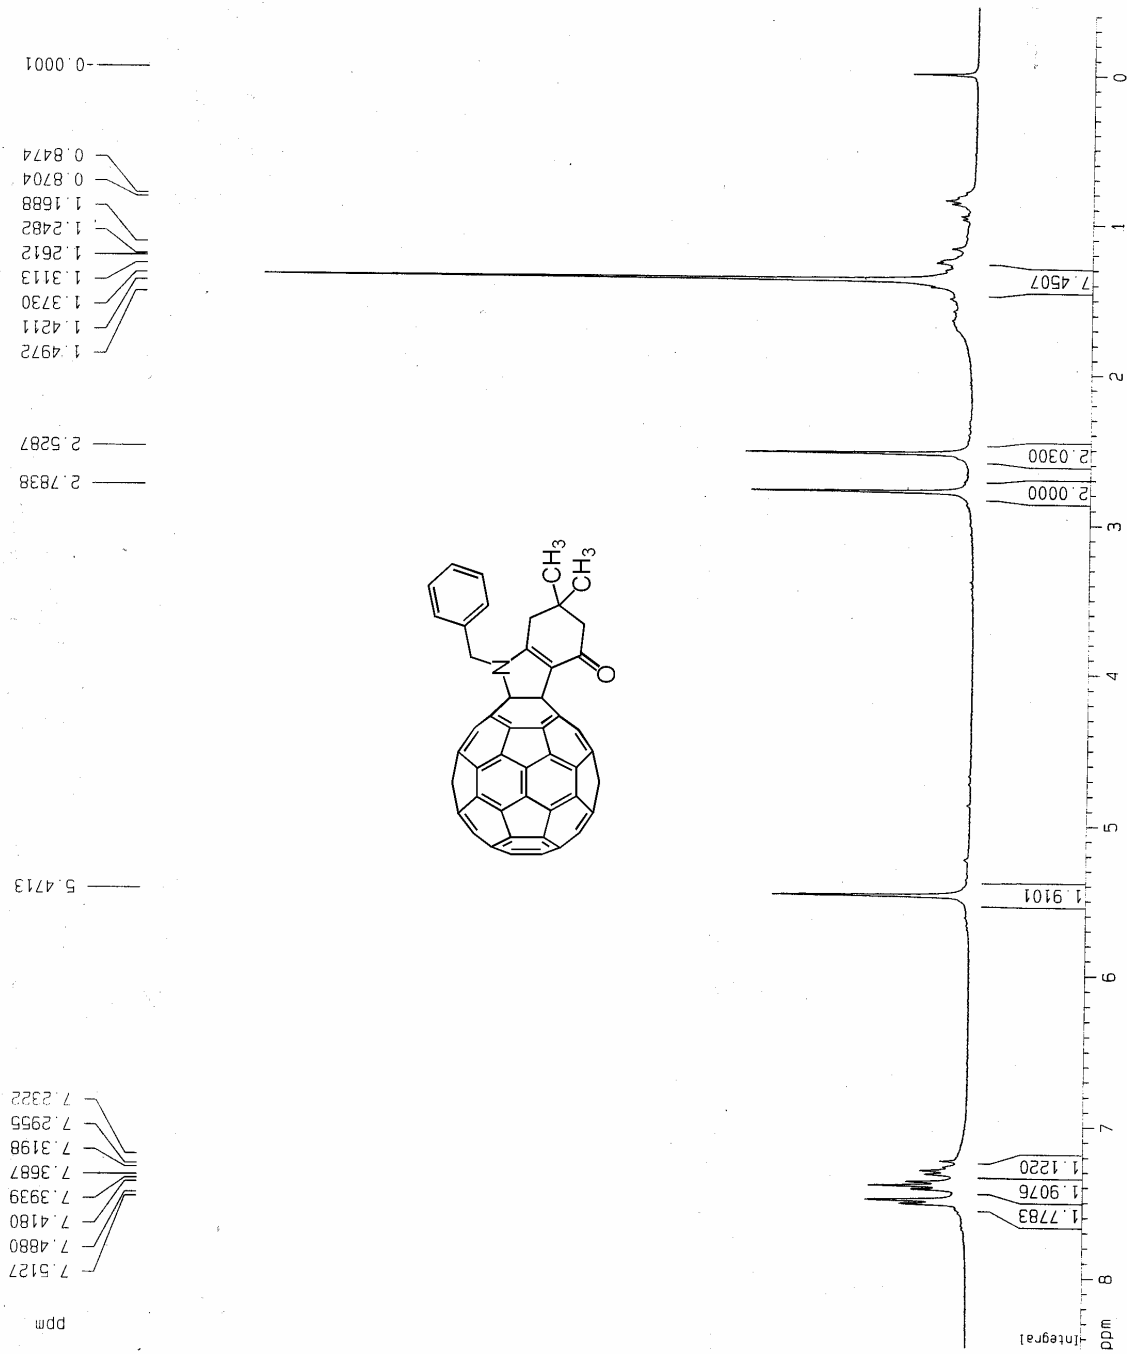

# <sup>1</sup>H NMR spectrum of 2d

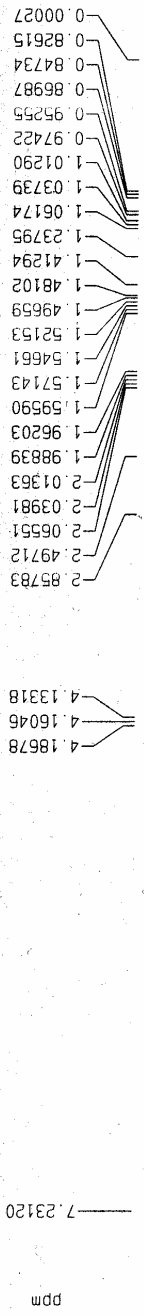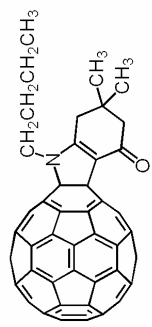

Current Data Parameters  
 NAME yanght050523  
 EXPNO 1  
 PROCNO 1

F2 - Acquisition Parameters  
 Date\_ 20050523  
 Time 15.28  
 INSTRUM av300  
 PROBHD 5 mm BBO BB-1H  
 PULPROG zg  
 TD 32768  
 SOLVENT CDCl3  
 NS 32  
 DS 2  
 SWH 5995.204 Hz  
 FIDRES 0.182959 Hz  
 AQ 2.7329011 sec  
 RG 203.2  
 DM 83.400 usec  
 DE 6.00 usec  
 TE 297.5 K  
 D1 2.00000000 sec  
 MCREST 0.00000000 sec  
 MCNRK 0.01500000 sec

===== CHANNEL f1 =====  
 NUC1 1H  
 P1 7.50 usec  
 PL1 -3.00 dB  
 SF01 300.1321009 MHz

F2 - Processing parameters  
 SI 16384  
 SF 300.1300152 MHz  
 WDW no  
 SSB 0  
 LB 0.00 Hz  
 GB 0  
 PC 1.00

1D NMR plot parameters  
 CX 22.00 cm  
 CY 0.00 cm  
 FIP 7.879 ppm  
 F1 2364.82 Hz  
 F2P -0.559 ppm  
 F2 -167.64 Hz  
 PPMCM 0.38354 ppm/cm  
 HZCM 115.11167 Hz/cm

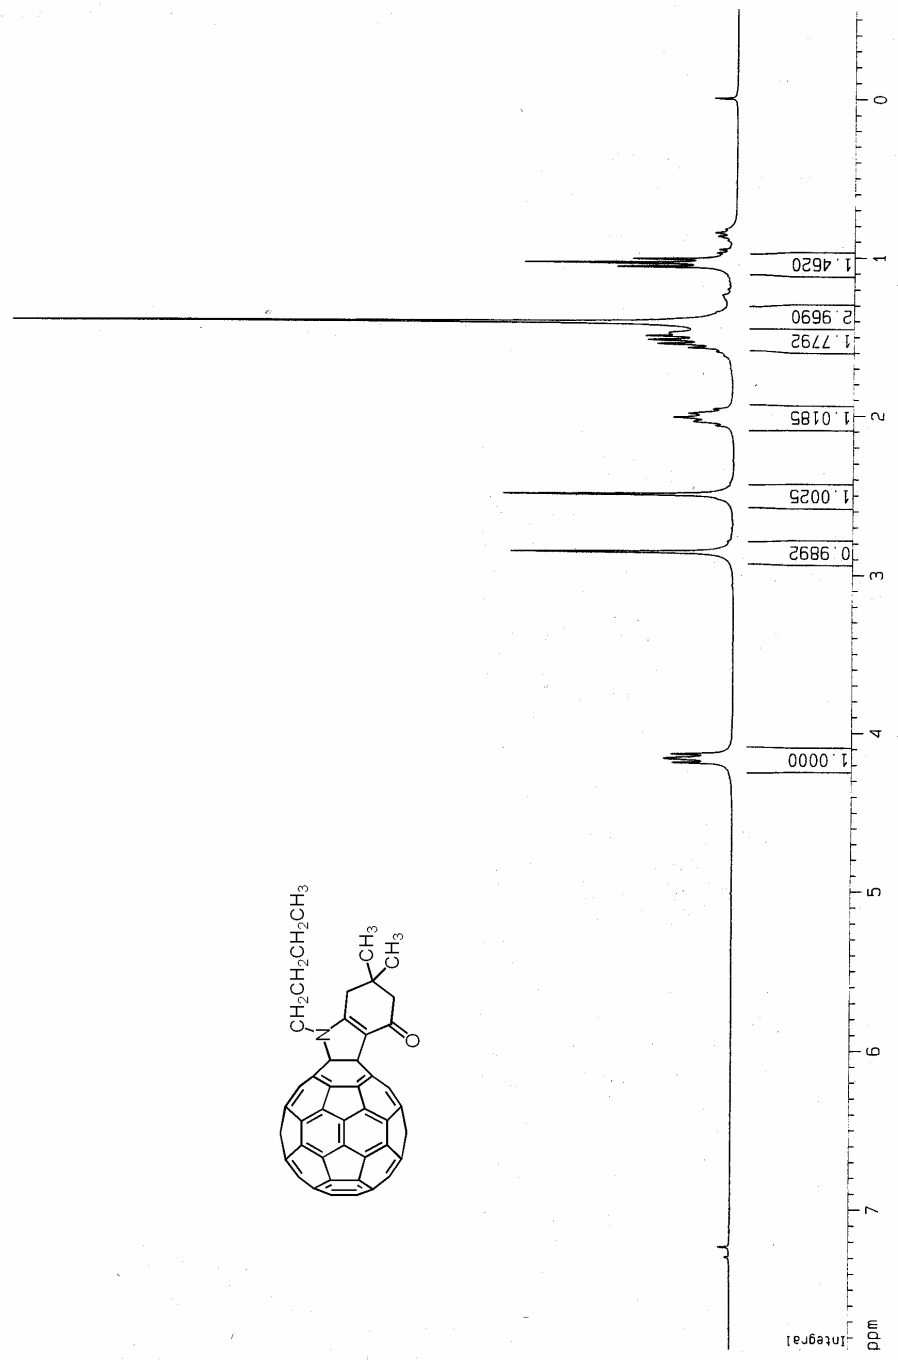

# <sup>1</sup>H NMR spectrum of 2e

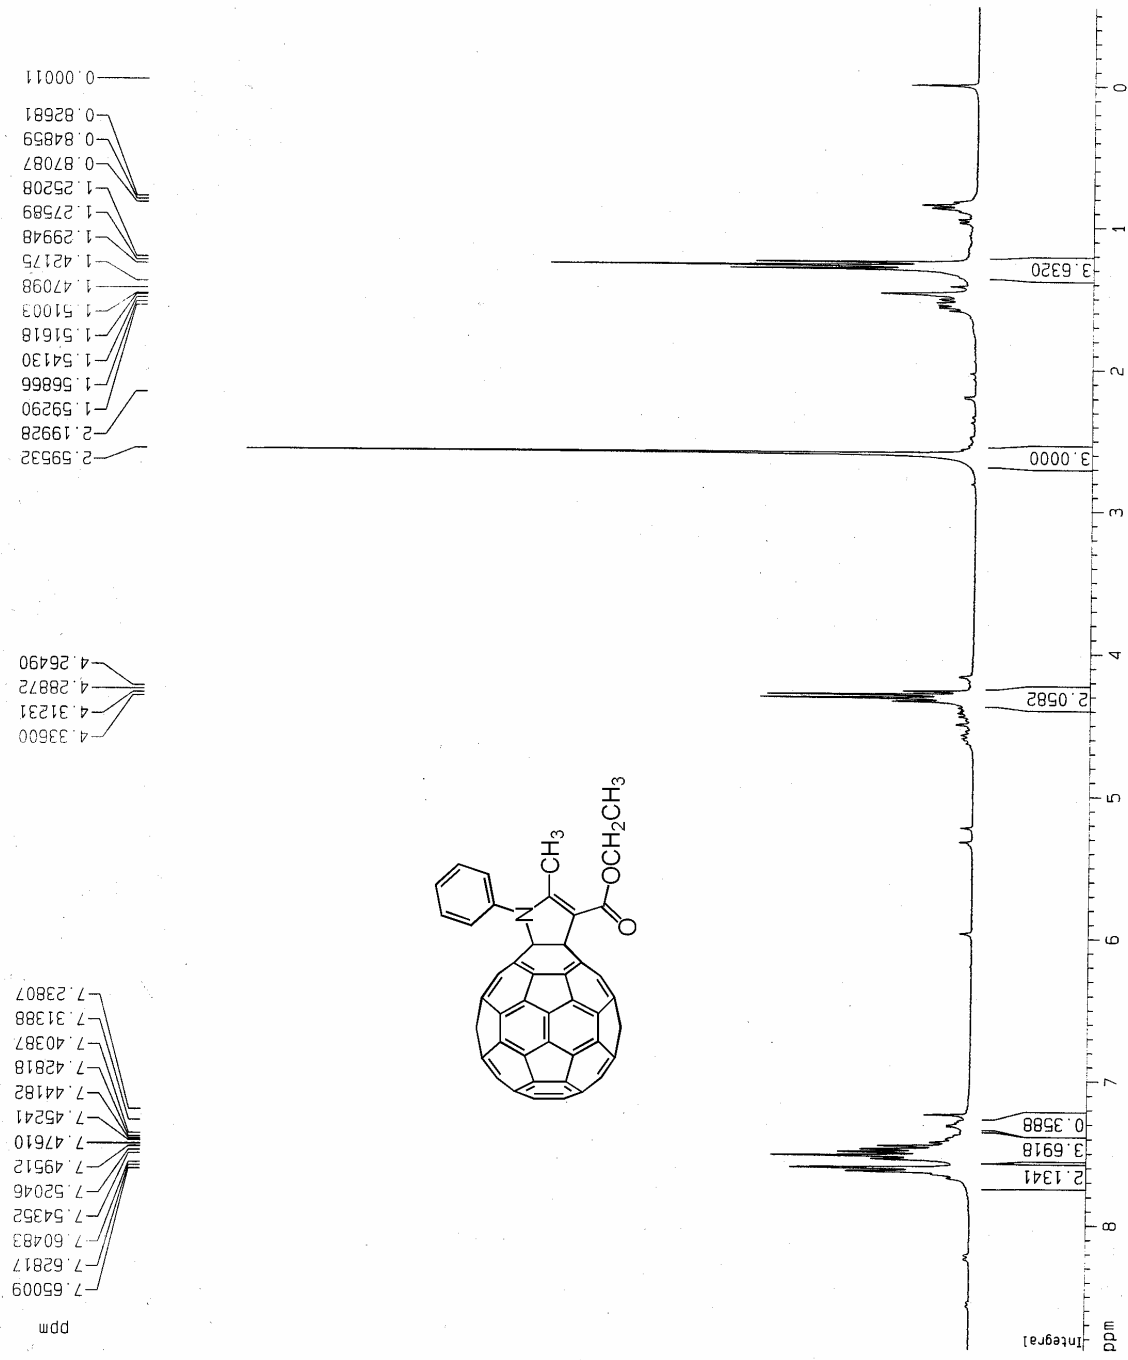

Current Data Parameters  
 NAME yangt050526  
 EXPNO 1  
 PROCNO 1

F2 - Acquisition Parameters  
 Date\_ 20050525  
 Time 15 25  
 INSTRUM av300  
 PROBHD 5 mm BBO BB-1H  
 PULPROG zg  
 TD 32768  
 SOLVENT CDCl3  
 NS 32  
 DS 2  
 SWH 5995.204 Hz  
 FIDRES 0.162959 Hz  
 AQ 2.7329011 sec  
 RG 322.5  
 DW 83.400 usec  
 DE 6.00 usec  
 TE 296.5 K  
 D1 2.00000000 sec  
 MCREST 0.00000000 sec  
 MCWRR 0.01500000 sec

==== CHANNEL f1 =====  
 NUC1 1H  
 P1 7.50 usec  
 PL1 -3.00 dB  
 SF01 300.1321009 MHz

F2 - Processing parameters  
 SI 16384  
 SF 300.1300141 MHz  
 MDW no  
 SSB 0  
 LB 0.00 Hz  
 GB 0  
 PC 1.00

4D NMR plot parameters  
 CX 22.00 cm  
 CY 0.00 cm  
 FJP 8.882 ppm  
 F1 2665.68 Hz  
 F2P -0.555 ppm  
 F2 -166.54 Hz  
 PPMCM 0.42894 ppm/cm  
 HZCM 128.73714 Hz/cm

# <sup>1</sup>H NMR spectrum of 2f

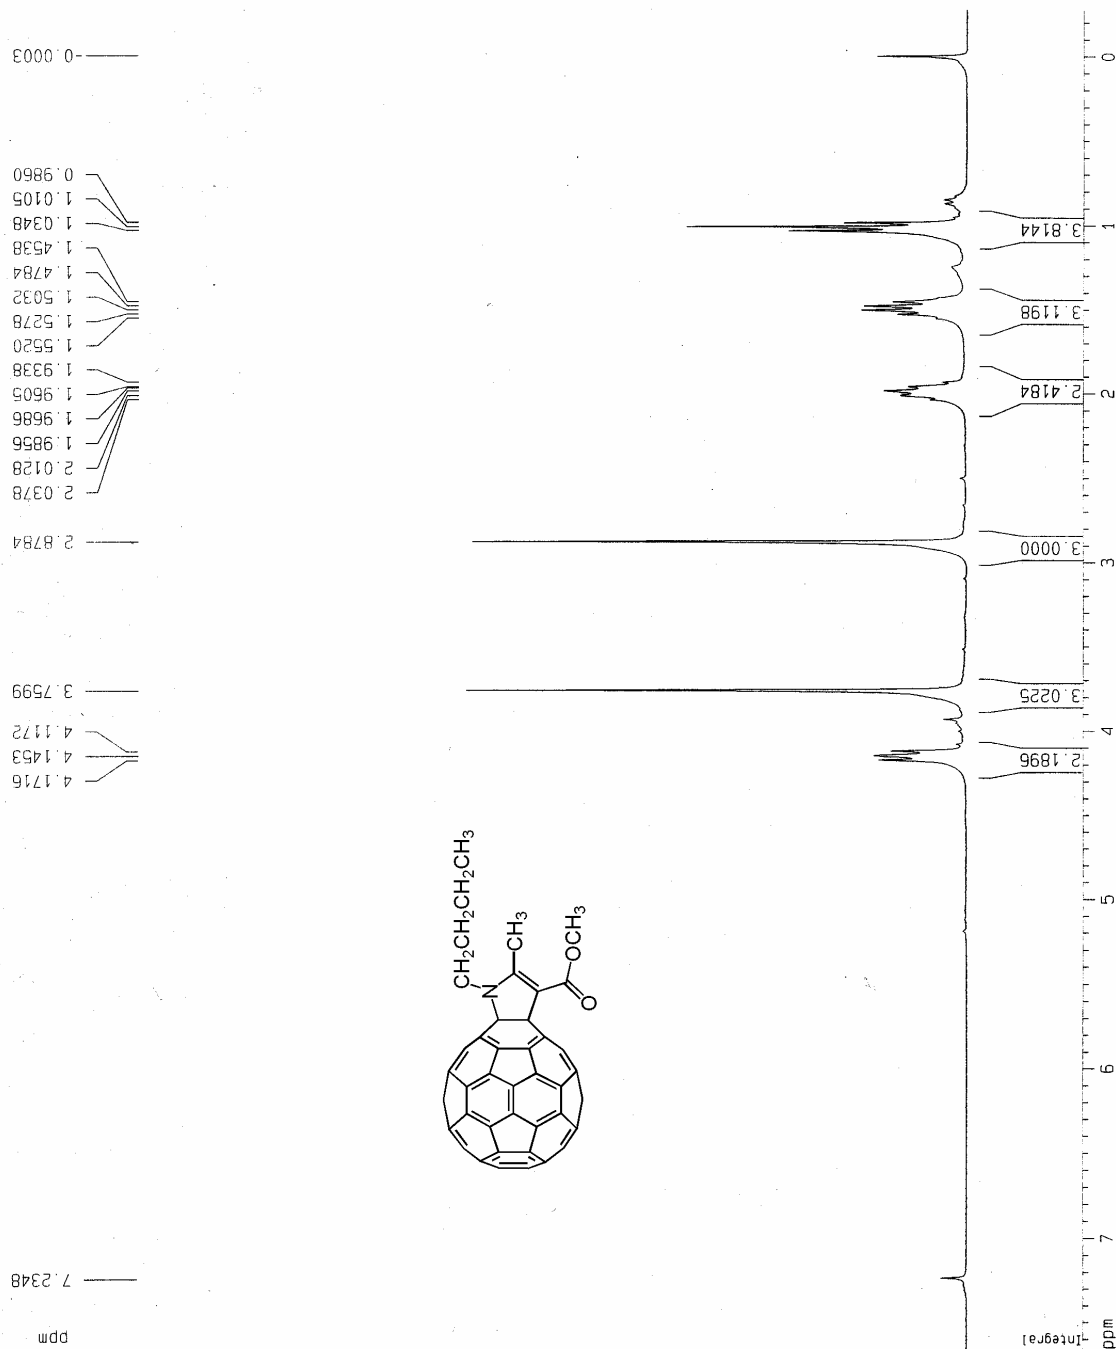

Current Data Parameters  
 NAME yanght050627  
 EXPNO 11  
 PROCNO 1

F2 - Acquisition Parameters  
 Date\_ 20050627

Time 15.03  
 INSTRUM av300  
 PROBHD 5 mm BBO BB-1H  
 PULPROG zg  
 TD 65536  
 SOLVENT CDCl3  
 NS 32  
 DS 2  
 SWH 5995.204 Hz  
 FIDRES 0.091480 Hz  
 AQ 5.4657526 sec  
 RG 362  
 DM 83.400 usec  
 DE 6.00 usec  
 TE 300.0 K  
 D1 2.00000000 sec  
 MCREST 0.00000000 sec  
 MCHRK 0.01500000 sec

===== CHANNEL f1 =====  
 NUC1 1H  
 P1 7.50 usec  
 PL1 -3.00 dB  
 SF01 300.1321009 MHz

F2 - Processing parameters  
 SI 16384  
 SF 300.1300137 MHz  
 WDW no  
 SSB 0  
 LB 0.00 Hz  
 GB 0  
 PC 1.00

ID NMR plot parameters  
 CX 22.00 cm  
 CY 0.00 cm  
 F1P 7.650 Dpm  
 F1 2298.85 Hz  
 F2P -0.278 Dpm  
 F2 -83.48 Hz  
 PPMCM 0.36080 Dpm/cm  
 HZCM 108.28774 Hz/cm

# <sup>1</sup>H NMR spectrum of 2g

7.2324  
7.3726  
7.3990  
7.4599  
7.4823  
7.5063  
7.5167  
7.5419  
7.5637  
7.6388  
7.6614  
7.7017  
7.7277  
ppm

2.8946  
2.6663  
2.5877  
2.5248  
2.0523  
1.4851  
1.2384  
0.8617  
0.8381  
-0.0122

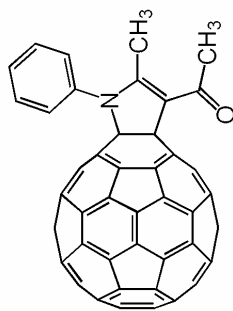

Current Data Parameters  
 NAME yanght050528  
 EXPNO 1  
 PROCNO 1

F2 - Acquisition Parameters  
 Date\_ 20050526  
 Time 17.57  
 INSTRUM av300  
 PROBHD 5 mm BBO BB-1H  
 PULPROG zg  
 TD 32768  
 SOLVENT CDCl3  
 NS 64  
 DS 2  
 SWH 5995.204 Hz  
 FIDRES 0.182959 Hz  
 AQ 2.7329011 sec  
 RG 287.4  
 DW 83.400 usec  
 DE 6.00 usec  
 TE 296.7 K  
 D1 2.00000000 sec  
 MCREST 0.00000000 sec  
 MCWPK 0.01500000 st

==== CHANNEL f1 =====  
 NUC1 1H  
 P1 7.50 usec  
 PL1 -3.00 dB  
 SF01 300.1321009 MHz

F2 - Processing parameters  
 SI 16384  
 SF 300.1300152 MHz  
 MDW no  
 SSB 0  
 LB 0.00 Hz  
 GB 0  
 PC 1.00

1D NMR plot parameters  
 CX 22.00 cm  
 CY 0.00 cm  
 F1P 8.705 ppm  
 F1 2612.90 Hz  
 F2P -0.490 ppm  
 F2 -146.96 Hz  
 PPMCM 0.41798 ppm/cm  
 HZCM 125.44823 Hz/cm

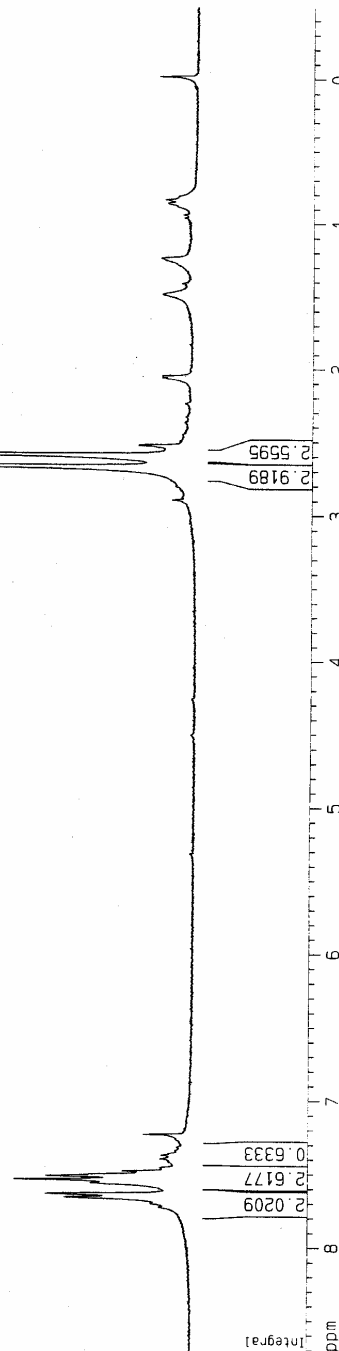

# <sup>1</sup>H NMR spectrum of 2h

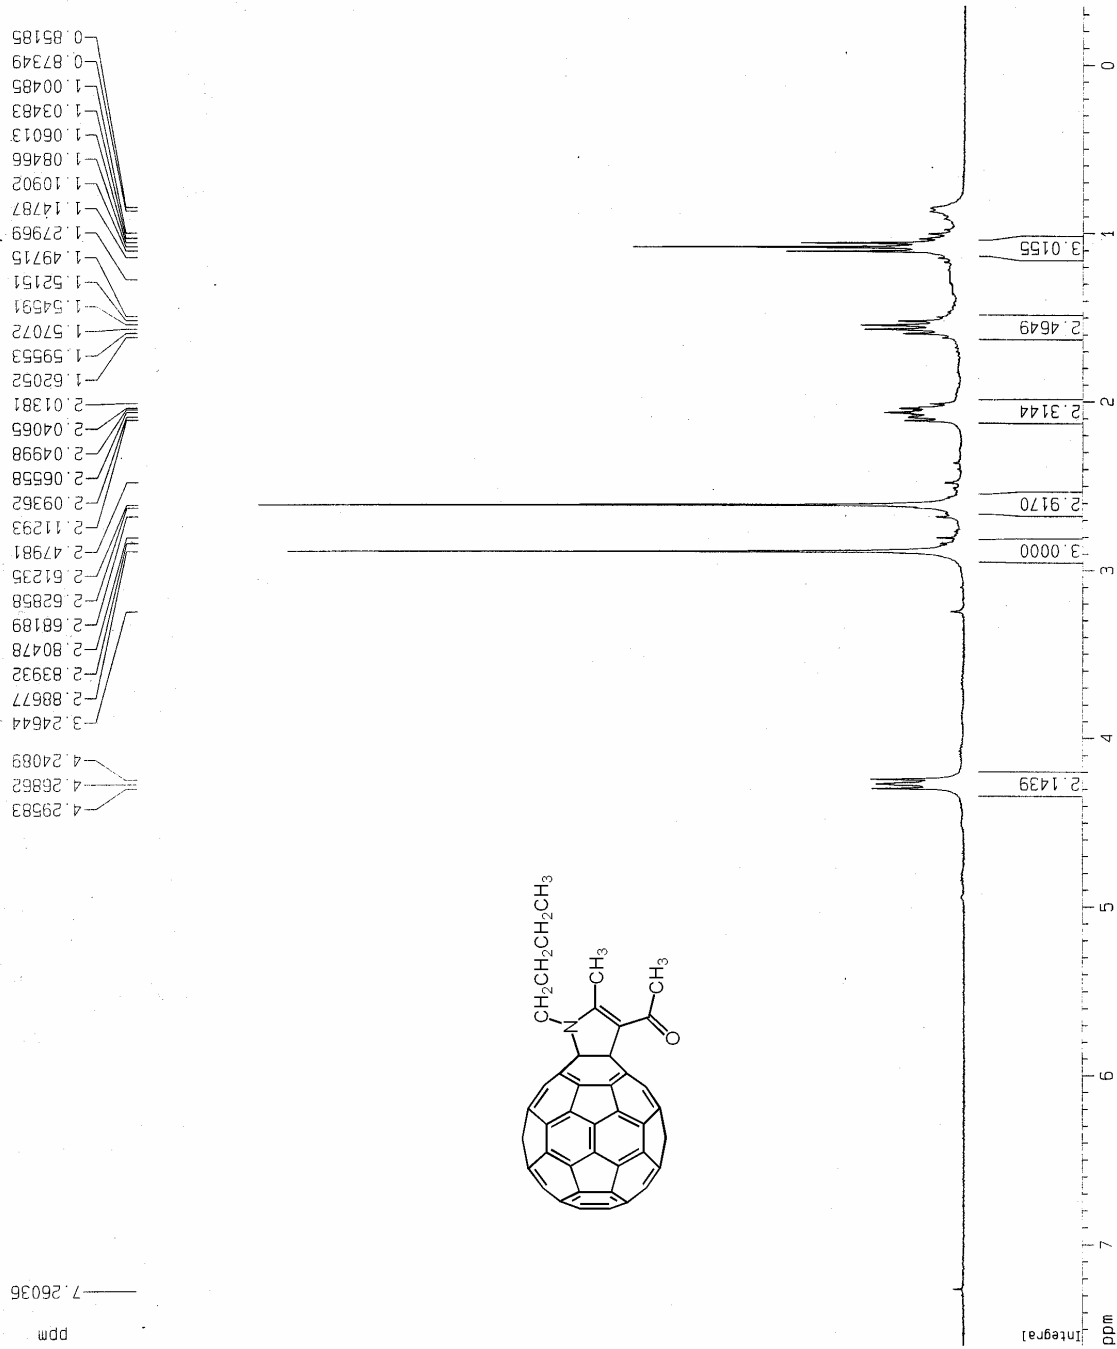

Current Data Parameters  
 NAME Yanght050711  
 EXPNO 1  
 PROCNO 1

F2 - Acquisition Parameters  
 Date\_ 20050711  
 Time 17.30  
 INSTRUM av300  
 PROBHD 5 mm BBO BB-1H  
 PULPROG zg  
 TD 32768  
 SOLVENT CDCl3  
 NS 64  
 DS 2  
 SMH 5995.204 Hz  
 FIDRES 0.182959 Hz  
 AQ 2.7329011 sec  
 RG 406.4  
 DM 83.400 usec  
 DE 6.00 usec  
 TE 300.0 K  
 D1 2.00000000 sec  
 MCREST 0.00000000 sec  
 MCMRK 0.01500000 sec

===== CHANNEL f1 =====  
 NUC1 1H  
 P1 7.50 usec  
 PL1 -3.00 dB  
 SF01 300.1321009 MHz

F2 - Processing parameters  
 SI 16384  
 SF 300.1300065 MHz  
 MDW no  
 SSB 0  
 LB 0.00 Hz  
 GB 0  
 PC 1.00

1D NMR plot parameters  
 CX 22.00 cm  
 CY 0.00 cm  
 F1P 7.594 ppm  
 F1 2279.33 Hz  
 F2P -0.350 ppm  
 F2 -105.12 Hz  
 PPMCM 0.36112 ppm/cm  
 HZCM 108.38436 Hz/cm
